# Supplementary material
Source: Research Square preprint supplement (doi:10.21203/rs.3.rs-9286941/v1)
Supplement: Supplementary file 1 [file d285881d5be53da8872f4673.docx]

**Table 1.** Hospitalization characteristics of patients admitted to an Orthogeriatric co-management service overall, and according to the fracture type (native hip vs. periprosthetic hip fracture)

|  | **Total**  **(n=328)** | **Native hip fracture**  **(n=289)** | **Periprosthetic hip fracture**  **(n=39)** | **P** |
| --- | --- | --- | --- | --- |
| Age (median [IQR]) | 85.00 [79.00, 90.00] | 85.00 [79.00, 90.00] | 84.00 [79.00, 88.00] | 0.52 |
| Male (%) | 103 (31.4) | 90 (31.1) | 13 (33.3) | 0.93 |
| Race (%) |  |  |  | 0.39 |
| White | 270 (82.3) | 236 (81.7) | 34 (87.2) |  |
| African American | 14 ( 4.3) | 14 ( 4.8) | 0 ( 0.0) |  |
| Other | 44 ( 13.4) | 39 ( 13.5) | 5 ( 12.9) |  |
| 1Frailty Index (median [IQR]) | 0.32 [0.18, 0.46] | 0.34 [0.18, 0.46] | 0.23 [0.14, 0.44] | 0.09 |
| History of falls or fractures (%) |  |  |  | 0.17 |
| Yes | 235 (71.6) | 203 (70.2) | 32 (82.1) |  |
| Not obtained | 35 (10.7) | 34 (11.8) | 1 ( 2.6) |  |
| Delirium at admission (%) |  |  |  | 0.52 |
| Yes | 84 (25.6) | 74 (25.6) | 10 (25.6) |  |
| Not obtained | 82 (25.0) | 75 (26.0) | 7 (17.9) |  |
| Operative (%) |  |  |  | 0.04 |
| Yes | 312 (95.1) | 278 (96.2) | 34 (87.2) |  |
| No | 16 ( 4.9) | 11 ( 3.8) | 5 (12.8) |  |
| 2Poverty level  (median [IQR]) | 7.6% [4.6%, 12.3%] | 7.9% [4.8%, 12.3%] | 6.3% [3.9%, 9.0%] | 0.02 |
|  |  |  |  |
| Length of stay (LOS) (median [IQR]) | 5.5 [4.0, 7.0] | 5.0 [4.0, 7.00] | 6.0 [4.5, 8.0] | 0.70 |

1. The Comprehensive Geriatric Assessment Frailty Index (CGA-FI) ranges from 0-1 with higher scores indicating a greater number of identified deficits.

2. The 2022 American Community Survey 5-year-estimate of the population below the federal poverty level in the corresponding zipcode was used to approximate the poverty level of the patient.

**Table 2**. Adjusted associations between patient characteristics and length of stay on an orthogeriatrics co-management service (n=328)

| **Patient Characteristics** | HR (95% CI) | p |
| --- | --- | --- |
| Age (per year) | 1.00 [0.99 ,1.01] | 0.99 |
| Female (vs Male) | 1.27 [1.00 ,1.61] | 0.048 |
| Race |  |  |
| White | 1 |  |
| African American | 1.28 [0.65 ,2.55] | 0.48 |
| Other | 0.79 [0.41 ,1.53] | 0.49 |
| Periprosthetic hip fractures (vs native hip) | 0.86 [0.60 ,1.23] | 0.41 |
| Delirium at admission |  |  |
| None | 1 |  |
| Delirium present on admission | 0.72 [0.53 ,0.99] | 0.04 |
| Delirium not assessed on admission | 0.80 [0.60 ,1.06] | 0.12 |
| History of falls or fractures |  |  |
| No | 1 |  |
| Yes | 1.06 [0.79 ,1.42] | 0.68 |
| Not collected | 0.99 [0.67 ,1.48] | 0.98 |
| Operative Management |  |  |
| Yes | 1 |  |
| No | 1.97 [0.89 ,4.37] | 0.10 |
| Frailty index (per 0.1 increment) | 0.96 [0.88, 1.04] | 0.37 |
| Poverty level (per 1% increment) | 1.00 [0.98 ,1.02] | 0.99 |
