# Supplementary material
Source: Research Square preprint supplement (doi:10.21203/rs.3.rs-9286941/v1)
Supplement: Supplementary file 2 [file f0af275d2060db5538de81f5.pdf]

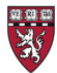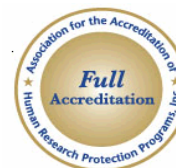

## Notice of Review

**IRB Protocol #:** 2021D000631  
**Principal Investigator:** Berry, Sarah  
**Protocol Title:** Implementing an Ortho-Geriatric Co-Management Service at BIDMC  
**Determination Review Date:** 8/3/2021

Your project has been reviewed by the Director of Operations for Committee on Clinical Investigations (CCI) in accordance with CCI policy. The CCI considers both the OHRP (45 CFR 46.102(f) and FDA (21 CFR 50.3(g); 21 CFR 56.102(e)) definitions when determining if an activity is human subject research.

The proposed activity as described DOES NOT constitute human subjects research. Therefore, no further CCI review and approval is required. This determination only applies to the activities described in this request. If there are any changes that may alter this determination, the investigator must submit another determination form detailing the revised activity.

This is a QI project. Any publications resulting from this project must specifically identify this as a QI project. Activities beyond the QI project described in this application will require submission to the CCI.

### PLEASE NOTE:

Please contact the Committee on Clinical Investigations (CCI) at [acollin3@bidmc.harvar.edu](mailto:acollin3@bidmc.harvar.edu), with any questions.
